# Supplementary material for: An Integrative Serum Pharmacology-Based Approach to Study the Anti-Tumor Activity of B. paniculatum Aqueous Bulb Extract on the Human Hepatocellular Carcinoma Cell Line BEL-7404
Source: Front Pharmacol. 2020 Oct 2;11:01261. doi: 10.3389/fphar.2020.01261 (PMC7569155; doi:10.3389/fphar.2020.01261)
Supplement: Supplementary file 2 [file Table_2.xlsx]

## Sheet: Sheet
OMIM Search - 'hepatoma '
Downloaded:	Feb 05, 2020
Copyright (c) 1966-2020 Johns Hopkins University OMIM, data are provided for research purposes only.
MIM Number	Title	Included Titles	Cytogenetic Location	Entrez Gene ID
#114550	HEPATOCELLULAR CARCINOMA	HEPATOBLASTOMA, INCLUDED	2q33.1	841
#114550	HEPATOCELLULAR CARCINOMA	HEPATOBLASTOMA, INCLUDED	3p22.1	1499
#114550	HEPATOCELLULAR CARCINOMA	HEPATOBLASTOMA, INCLUDED	3q26.32	5290
#114550	HEPATOCELLULAR CARCINOMA	HEPATOBLASTOMA, INCLUDED	5q22.2	324
#114550	HEPATOCELLULAR CARCINOMA	HEPATOBLASTOMA, INCLUDED	6q25.3	3482
#114550	HEPATOCELLULAR CARCINOMA	HEPATOBLASTOMA, INCLUDED	7q31.2	4233
#114550	HEPATOCELLULAR CARCINOMA	HEPATOBLASTOMA, INCLUDED	8p22	5157
#114550	HEPATOCELLULAR CARCINOMA	HEPATOBLASTOMA, INCLUDED	16p13.3	8312
#114550	HEPATOCELLULAR CARCINOMA	HEPATOBLASTOMA, INCLUDED	17p13.9	7157
*600339	HEPATOMA-DERIVED GROWTH FACTOR; HDGF		1q23.1	3068
*138140	SOLUTE CARRIER FAMILY 2 (FACILITATED GLUCOSE TRANSPORTER), MEMBER 1; SLC2A1		1p34.2	6513
*179610	EPHRIN RECEPTOR EphA1; EPHA1		7q34-q35	2041
*600011	EPHRIN RECEPTOR EphB4; EPHB4		7q22.1	2050
*608451	ETHE1 GENE; ETHE1		19q13.31	23474
*615613	HEPATOCELLULAR CARCINOMA-ASSOCIATED TRANSCRIPT 5; HCCAT5		16q22.3	283902
*616643	HEPATOMA-DERIVED GROWTH FACTOR-RELATED PROTEIN 3		15q25.2	50810
*617859	DISCS LARGE-ASSOCIATED PROTEIN 5; DLGAP5		14q22.3	9787
*617884	HEPATOMA-DERIVED GROWTH FACTOR-LIKE PROTEIN 2; HDGFL2		19p13.3	84717
*138680	ALPHA-2-HS-GLYCOPROTEIN; AHSG		3q27.3	197
*610580	ONCOGENE PIM3; PIM3		22q13.33	415116
601136	TRANSSUPPRESSOR OF EXPRESSION 2		Chr.2	57324
*107400	SERPIN PEPTIDASE INHIBITOR, CLADE A, MEMBER 1; SERPINA1		14q32.13	5265
*132810	EPOXIDE HYDROLASE 1, MICROSOMAL; EPHX1		1q42.12	2052
*138600	OROSOMUCOID 1; ORM1		9q32	5004
*179050	PYRUVATE KINASE, MUSCLE; PKM	PYRUVATE KINASE, MUSCLE, 1, INCLUDED; PKM1, INCLUDED	15q23	5315
*188830	PROTEIN KINASE, cAMP-DEPENDENT, REGULATORY, TYPE I, ALPHA; PRKAR1A	PRKAR1A/RARA FUSION GENE, INCLUDED	17q24.2	5573
*607786	PROPROTEIN CONVERTASE, SUBTILISIN/KEXIN-TYPE, 9; PCSK9		1p32.3	255738
*608862	NAD(P)HX EPIMERASE; NAXE		1q22	128240
*612982	MICRO RNA 210; MIR210		11p15.5	406992
*613018	TYROSINE AMINOTRANSFERASE; TAT		16q22.2	6898
*617298	APOPTOSIS-INDUCING FACTOR, MITOCHONDRIA-ASSOCIATED, 3; AIFM3		22q11.21	150209
*618199	APOBEC1 COMPLEMENTATION FACTOR; A1CF		10q11.23	29974
+147545	INSULIN RECEPTOR SUBSTRATE 1; IRS1	CORONARY ARTERY DISEASE, SUSCEPTIBILITY TO, INCLUDED	2q36.3	3667
603416	RIBOSOMAL PROTEIN L21 PSEUDOGENE 1; RPL21P1		12q24.2-q24.3	6145
*104155	ZINC FINGER HOMEOBOX 3; ZFHX3		16q22.2-q22.3	463
*108360	ASIALOGLYCOPROTEIN RECEPTOR 1; ASGR1		17p13.1	432
*116810	CATHEPSIN B; CTSB	REGULATORY ELEMENT, CIS-ACTING, ENHANCER, UPSTREAM OF CTSB, INCLUDED	8p23.1	1508
*118455	CYTOCHROME P450, SUBFAMILY VIIA, POLYPEPTIDE 1; CYP7A1		8q12.1	1581
*602063	TRANSALDOLASE 1; TALDO1		11p15.5	6888
*608065	SOLUTE CARRIER FAMILY 38 (AMINO ACID TRANSPORTER), MEMBER 4; SLC38A4		12q13.11	55089
*138700	APOLIPOPROTEIN H; APOH		17q24.2	350
*141250	HEME OXYGENASE 1; HMOX1		22q12.3	3162
*142440	HEPSIN; HPN		19q13.11	3249
*147450	SUPEROXIDE DISMUTASE 1; SOD1		21q22.11	6647
*150570	LECTIN, GALACTOSIDE-BINDING, SOLUBLE, 1; LGALS1		22q13.1	3956
*156349	METALLOTHIONEIN 1B; MT1B		16q13	4490
*176761	PROLACTIN RECEPTOR; PRLR		5p13.2	5618
*191170	TUMOR PROTEIN p53; TP53		17p13.1	7157
*600698	HIGH MOBILITY GROUP AT-HOOK 2; HMGA2	HMGIC/LPP FUSION GENE, INCLUDED	12q14.3	8091
*600833	SUPPRESSOR OF TUMORIGENICITY 7; ST7		7q31.2	7982
*601799	PROTEASE INHIBITOR 9, OVALBUMIN TYPE; PI9		6p25.2	5272
*603029	TOLL-LIKE RECEPTOR 3; TLR3		4q35.1	7098
*603234	ATP-BINDING CASSETTE, SUBFAMILY C, MEMBER 6; ABCC6		16p13.11	368
*603314	SOLUTE CARRIER FAMILY 27 (FATTY ACID TRANSPORTER), MEMBER 5; SLC27A5		19q13.43	10998
*603826	NUCLEAR RECEPTOR SUBFAMILY 1, GROUP H, MEMBER 4; NR1H4		12q23.1	9971
*604064	ACTIVATING TRANSCRIPTION FACTOR 4; ATF4		22q13.1	468
*605330	INTERLEUKIN 22; IL22		12q15	50616
*606573	FYN-RELATED KINASE; FRK		6q22.1	2444
*606860	COMPLEMENT COMPONENT 1 INHIBITOR; C1NH		11q12.1	710
*608271	MICROTUBULE-ACTIN CROSS-LINKING FACTOR 1; MACF1		1p34.3	23499
*609504	MICROSPHERULE PROTEIN 1; MCRS1	MICROSPHERULE PROTEIN, 58-KD, INCLUDED; MSP58, INCLUDED	12q13.12	10445
*609631	DEAD BOX POLYPEPTIDE 58; DDX58		9p21.1	23586
*611132	RIBOKINASE; RBKS		2p23.2	64080
*611266	POTE ANKYRIN DOMAIN FAMILY, MEMBER K, PSEUDOGENE; POTEKP		2q21.1	440915
*611864	ARMADILLO REPEAT-CONTAINING 10; ARMC10		7q22.1	83787
*611998	cAMP RESPONSE ELEMENT-BINDING PROTEIN 3-LIKE 3; CREB3L3		19p13.3	84699
*612283	PROTEIN C; PROC		2q14.3	5624
*615090	INTERFERON, LAMBDA-4; IFNL4		19q13.2	101180976
*616810	IMMUNOGLOBULIN SUPERFAMILY, DCC SUBCLASS, MEMBER 4; IGDCC4		15q22.31	57722
*616971	ENDOPLASMIC RETICULUM-GOLGI INTERMEDIATE COMPARTMENT PROTEIN 3; ERGIC3		20q11.22	51614
+100650	ALDEHYDE DEHYDROGENASE 2 FAMILY; ALDH2	SUBLINGUAL NITROGLYCERIN, SUSCEPTIBILITY TO POOR RESPONSE TO, INCLUDED	12q24.12	217
+142910	3-HYDROXY-3-METHYLGLUTARYL-CoA REDUCTASE; HMGCR	LOW DENSITY LIPOPROTEIN CHOLESTEROL LEVEL QUANTITATIVE TRAIT LOCUS 3, INCLUDED; LDLCQ3, INCLUDED	5q13.3	3156
*100660	ALDEHYDE DEHYDROGENASE, FAMILY 3, SUBFAMILY A, MEMBER 1; ALDH3A1		17p11.2	218
*102560	ACTIN, GAMMA-1; ACTG1		17q25.3	71
*103850	ALDOLASE A, FRUCTOSE-BISPHOSPHATE; ALDOA		16p11.2	226
*104150	ALPHA-FETOPROTEIN; AFP		4q13.3	174
*104615	SOLUTE CARRIER FAMILY 7 (CATIONIC AMINO ACID TRANSPORTER, y+ SYSTEM), MEMBER 1; SLC7A1		13q12.3	6541
*104750	SERUM AMYLOID A1; SAA1		11p15.1	6288
*107323	ALDEHYDE DEHYDROGENASE 7 FAMILY, MEMBER A1; ALDH7A1		5q23.2	501
*107680	APOLIPOPROTEIN A-I; APOA1	APOA1/APOC3 FUSION GENE, INCLUDED	11q23.3	335
*107720	APOLIPOPROTEIN C-III; APOC3	APOC3/APOA1 FUSION GENE, INCLUDED	11q23.3	345
*107730	APOLIPOPROTEIN B; APOB	APOB100, INCLUDED	2p24.1	338
*107760	APOLIPOPROTEIN F; APOF		12q13.3	319
*107930	DOPA DECARBOXYLASE; DDC		7p12.2-p12.1	1644
*108361	ASIALOGLYCOPROTEIN RECEPTOR 2; ASGR2		17p13.1	433
*116880	CATHEPSIN L; CTSL		9q21.33	1514
*126110	ARYL HYDROCARBON RECEPTOR NUCLEAR TRANSLOCATOR; ARNT	ARNT/TEL FUSION GENE, INCLUDED	1q21.3	405
*602010	SPLICING FACTOR, SERINE/ARGININE-RICH, 11; SRSF11		1p31.1	9295
*600380	NUCLEAR RECEPTOR SUBFAMILY 1, GROUP H, MEMBER 2; NR1H2		19q13.33	7376
*600390	UPSTREAM TRANSCRIPTION FACTOR 2, FOS-INTERACTING; USF2		19q13.12	7392
*608069	ERBB RECEPTOR FEEDBACK INHIBITOR 1; ERRFI1		1p36.23	54206
*131550	EPIDERMAL GROWTH FACTOR RECEPTOR; EGFR	EGFR/SEPT14 FUSION GENE, INCLUDED	7p11.2	1956
*133290	ESTERASE B3; ESB3		Chr.16	2097
*134795	FIBRILLARIN; FBL		19q13.2	2091
*138170	SOLUTE CARRIER FAMILY 2 (FACILITATED GLUCOSE TRANSPORTER), MEMBER 3; SLC2A3	SOLUTE CARRIER FAMILY 2, MEMBER 3 PSEUDOGENE, INCLUDED; SLC2A3P, INCLUDED	12p13.31	6515
*138200	GLUTAMATE PYRUVATE TRANSAMINASE; GPT		8q24.3	2875
*138430	GLYCEROL-3-PHOSPHATE DEHYDROGENASE 2; GPD2		2q24.1	2820
*139605	HES FAMILY bHLH TRANSCRIPTION FACTOR 1; HES1		3q29	3280
*142385	HEPATIC LEUKEMIA FACTOR; HLF	HLF/E2A FUSION GENE, INCLUDED	17q22	3131
*146730	INSULIN-LIKE GROWTH FACTOR-BINDING PROTEIN 1; IGFBP1		7p12.3	3484
*147700	ISOCITRATE DEHYDROGENASE 1; IDH1		2q34	3417
*150330	LAMIN A/C; LMNA	LAMIN A, INCLUDED	1q22	4000
*150571	LECTIN, GALACTOSIDE-BINDING, SOLUBLE, 2; LGALS2		22q13.1	3957
*156353	METALLOTHIONEIN 1G; MT1G		16q13	4495
*156570	5-METHYLTETRAHYDROFOLATE-HOMOCYSTEINE S-METHYLTRANSFERASE; MTR		1q43	4548
*157655	NADH-UBIQUINONE OXIDOREDUCTASE Fe-S PROTEIN 1; NDUFS1		2q33.3	4719
*162151	PROPROTEIN CONVERTASE, SUBTILISIN/KEXIN-TYPE, 2; PCSK2		20p12.1	5126
*162650	NEUROTENSIN; NTS		12q21.31	4922
*164017	HETEROGENEOUS NUCLEAR RIBONUCLEOPROTEIN A1; HNRNPA1		12q13.13	3178
*164035	NUCLEOLIN; NCL		2q37.1	4691
*164040	NUCLEOPHOSMIN/NUCLEOPLASMIN FAMILY, MEMBER 1; NPM1	NPM1/ALK FUSION GENE, INCLUDED	5q35.1	4869
*173870	POLY(ADP-RIBOSE) POLYMERASE 1; PARP1		1q42.12	142
*176801	PROSAPOSIN; PSAP	SAPOSIN A, INCLUDED; SAPA, INCLUDED	10q22.1	5660
*186845	CD81 ANTIGEN; CD81		11p15.5	975
*189907	HNF1 HOMEOBOX B; HNF1B		17q12	6928
*190180	TRANSFORMING GROWTH FACTOR, BETA-1; TGFB1		19q13.2	7040
*190182	TRANSFORMING GROWTH FACTOR-BETA RECEPTOR, TYPE II; TGFBR2		3p24.1	7048
*191523	UPSTREAM TRANSCRIPTION FACTOR 1; USF1		1q23.3	7391
*300086	LYSOPHOSPHATIDIC ACID RECEPTOR 4; LPAR4		Xq21.1	2846
*300231	SOLUTE CARRIER FAMILY 9, MEMBER 6; SLC9A6		Xq26.3	10479
*300474	GLYCEROL KINASE; GK		Xp21.2	2710
*300772	TRANSCRIPTION FACTOR DP FAMILY, MEMBER 3; TFDP3		Xq26.2	51270
*300798	PHOSPHORYLASE KINASE, LIVER, ALPHA-2 SUBUNIT; PHKA2		Xp22.13	5256
*305900	GLUCOSE-6-PHOSPHATE DEHYDROGENASE; G6PD		Xq28	2539
*600013	TRANSCRIPTION FACTOR YY1; YY1		14q32.2	7528
*600212	FATTY ACID SYNTHASE; FASN		17q25.3	2194
*600249	ALDEHYDE DEHYDROGENASE 1 FAMILY, MEMBER L1; ALDH1L1		3q21.3	10840
*600289	MITOGEN-ACTIVATED PROTEIN KINASE 14; MAPK14	CYTOKINE-SUPPRESSIVE ANTIINFLAMMATORY DRUG-BINDING PROTEIN 2, INCLUDED; CSBP2, INCLUDED	6p21.31	1432
*600473	PURINE-RICH ELEMENT-BINDING PROTEIN A; PURA		5q31.3	5813
*600516	BCL2 ANTAGONIST KILLER 1; BAK1	BAK-LIKE, INCLUDED	6p21.31	578
*600527	EPHRIN B2; EFNB2		13q33.3	1948
*600579	PROTEIN-TYROSINE PHOSPHATASE, RECEPTOR-TYPE, O; PTPRO		12p12.3	5800
*600615	LECTIN, GALACTOSIDE-BINDING, SOLUBLE, 7; LGALS7		19q13.2	3963
*600694	INTERLEUKIN 6 SIGNAL TRANSDUCER; IL6ST		5q11.2	3572
*600946	GROWTH HORMONE RECEPTOR; GHR	GROWTH HORMONE-BINDING PROTEIN, INCLUDED; GHBP, INCLUDED	5p13-p12	2690
*601009	TIGHT JUNCTION PROTEIN 1; TJP1		15q13.1	7082
*601019	SOLUTE CARRIER FAMILY 6 (NEUROTRANSMITTER TRANSPORTER, GLYCINE), MEMBER 9; SLC6A9	GLYCINE TRANSPORTER 1A, INCLUDED; GLYT1A, INCLUDED	1p34.1	6536
*601125	HEXOKINASE 2; HK2		2p12	3099
*601288	TYROSINE 3-MONOOXYGENASE/TRYPTOPHAN 5-MONOOXYGENASE ACTIVATION PROTEIN, ZETA ISOFORM; YWHAZ		8q22.3	7534
*601310	CYTOCHROME P450, SUBFAMILY IVA, POLYPEPTIDE 11; CYP4A11		1p33	1579
*601510	SREBP CLEAVAGE-ACTIVATING PROTEIN; SCAP		3p21.31	22937
*601591	PROTEIN KINASE, cGMP-DEPENDENT, TYPE II; PRKG2		4q21.21	5593
*601731	5-AMINOIMIDAZOLE-4-CARBOXAMIDE RIBONUCLEOTIDE FORMYLTRANSFERASE/IMP CYCLOHYDROLASE; ATIC		2q35	471
*601826	DIACYLGLYCEROL KINASE, DELTA, 130-KD; DGKD		2q37.1	8527
*601854	DIACYLGLYCEROL KINASE, GAMMA, 90-KD; DGKG		3q27.2-q27.3	1608
*601870	METHIONINE AMINOPEPTIDASE 2; METAP2		12q22	10988
*601872	SOLUTE CARRIER FAMILY 7 (CATIONIC AMINO ACID TRANSPORTER, y+ SYSTEM), MEMBER 2; SLC7A2		8p22	6542
*601922	ANGIOPOIETIN 2; ANGPT2		8p23.1	285
*601924	COATOMER PROTEIN COMPLEX, SUBUNIT ALPHA; COPA	COATOMER PROTEIN COMPLEX, INCLUDED; COPI, INCLUDED	1q23.2	1314
*602173	SEC62 HOMOLOG, PREPROTEIN TRANSLOCATION FACTOR; SEC62		3q26.2	7095
*602287	ENDOPLASMIC RETICULUM PROTEIN, 29-KD; ERP29		12q24.13	10961
*602341	FORKHEAD BOX M1; FOXM1		12p13.33	2305
*602391	PHOSPHATIDYLETHANOLAMINE N-METHYLTRANSFERASE; PEMT	PEMT1, INCLUDED	17p11.2	10400
*602423	NUCLEAR RECEPTOR SUBFAMILY 1, GROUP H, MEMBER 3; NR1H3		11p11.2	10062
*602958	SERUM/GLUCOCORTICOID-REGULATED KINASE 1; SGK1		6q23.2	6446
*602961	UBIQUITIN-CONJUGATING ENZYME E2D 1; UBE2D1		10q21.1	7321
*603214	ATP-BINDING CASSETTE, SUBFAMILY D, MEMBER 4; ABCD4		14q24.3	5826
*603287	PYRIDOXAMINE 5-PRIME-PHOSPHATE OXIDASE; PNPO		17q21.32	55163
*603319	ANNEXIN A9; ANXA9		1q21.3	8416
*603466	EMBRYONIC LETHAL, ABNORMAL VISION, DROSOPHILA, HOMOLOG-LIKE 1; ELAVL1		19p13.2	1994
*603584	MAP KINASE-ACTIVATING DEATH DOMAIN; MADD		11p11.2	8567
*603718	CLAUDIN 1; CLDN1		3q28	9076
*603734	INTERFERON REGULATORY FACTOR 3; IRF3		19q13.33	3661
*603816	AXIS INHIBITOR 1; AXIN1		16p13.3	8312
*603850	DYNAMIN 1-LIKE; DNM1L		12p11.21	10059
*604141	ADP-RIBOSYLATION FACTOR GUANINE NUCLEOTIDE EXCHANGE FACTOR 1; ARFGEF1		8q13.2	10565
*604167	CCCTC-BINDING FACTOR; CTCF		16q22.1	10664
*604258	DELETED IN LIVER CANCER 1; DLC1		8p22	10395
*604355	COATOMER PROTEIN COMPLEX, SUBUNIT GAMMA-2; COPG2		7q32.2	26958
*604426	CYTOCHROME P450, FAMILY 4, SUBFAMILY F, POLYPEPTIDE 2; CYP4F2		19p13.12	8529
*604453	NUCLEAR RECEPTOR SUBFAMILY 5, GROUP A, MEMBER 2; NR5A2		1q32.1	2494
*604502	HIGH MOBILITY GROUP NUCLEOSOMAL BINDING PROTEIN 3; HMGN3		6q14.1	9324
*604521	3-HYDROXYANTHRANILATE 3,4-DIOXYGENASE; HAAO		2p21	23498
*604604	SOLUTE CARRIER FAMILY 30 (ZINC TRANSPORTER), MEMBER 9; SLC30A9		4p13	10463
*604847	G PROTEIN-COUPLED RECEPTOR 26; GPR26		10q26.13	2849
*604857	SIGNAL RECOGNITION PARTICLE, 54-KD; SRP54		14q13.2	6729
*604858	SIGNAL RECOGNITION PARTICLE, 68-KD; SRP68		17q25.1	6730
*605066	TYROSINE 3-MONOOXYGENASE/TRYPTOPHAN 5-MONOOXYGENASE ACTIVATION PROTEIN, EPSILON ISOFORM; YWHAE		17p13.3	7531
*605197	KYNURENINASE; KYNU		2q22.2	8942
*605217	SHC TRANSFORMING PROTEIN 2; SHC2		19p13.3	25759
*605299	NUCLEAR RECEPTOR COACTIVATOR 6; NCOA6		20q11.22	23054
*605459	ATP-BINDING CASSETTE, SUBFAMILY G, MEMBER 5; ABCG5		2p21	64240
*605460	ATP-BINDING CASSETTE, SUBFAMILY G, MEMBER 8; ABCG8		2p21	64241
*605652	F-BOX AND LEUCINE-RICH REPEAT PROTEIN 2; FBXL2		3p22.3	25827
*605826	HEME-BINDING PROTEIN 1; HEBP1	FPRL2 LIGAND, INCLUDED; F2L, INCLUDED	12p13.1	50865
*606261	NUDIX HYDROLASE 6; NUDT6		4q28.1	11162
*606425	EGL9 FAMILY HYPOXIA-INDUCIBLE FACTOR 1; EGLN1		1q42.2	54583
*606463	GLUCOSIDASE, BETA, ACID; GBA	GLUCOCEREBROSIDASE PSEUDOGENE, INCLUDED; GBAP, INCLUDED	1q22	2629
*606464	HEPCIDIN ANTIMICROBIAL PEPTIDE; HAMP		19q13.12	57817
*606495	MAP/MICROTUBULE AFFINITY-REGULATING KINASE 4; MARK4		19q13.32	57787
*606756	17-BETA-HYDROXYSTEROID DEHYDROGENASE VII; HSD17B7		1q23.3	51478
*606795	SOLUTE CARRIER FAMILY 25 (MITOCHONDRIAL CARRIER), MEMBER 17; SLC25A17		22q13.2	10478
*606882	ATPase, Cu(2+)-TRANSPORTING, BETA POLYPEPTIDE; ATP7B		13q14.3	540
*606915	G PROTEIN-COUPLED RECEPTOR 63; GPR63		6q16.1	81491
*606951	INTERFERON-INDUCED HELICASE C DOMAIN-CONTAINING PROTEIN 1; IFIH1		2q24.2	64135
*607118	MITOCHONDRIAL RIBOSOMAL PROTEIN L3; MRPL3		3q22.1	11222
*607120	PHOSPHOLIPASE C, BETA-1; PLCB1	PLCB1A, INCLUDED	20p12.3	23236
*607378	SERPINE1 mRNA-BINDING PROTEIN 1; SERBP1		1p31.3	26135
*607608	SPHINGOMYELIN PHOSPHODIESTERASE 1, ACID LYSOSOMAL; SMPD1		11p15.4	6609
*607918	SELENOPROTEIN S; SELENOS		15q26.3	55829
*607983	GOLGIN, RAB6-INTERACTING; GORAB		1q24.2	92344
*608305	SOLUTE CARRIER FAMILY 13 (SODIUM-DEPENDENT CITRATE TRANSPORTER), MEMBER 5; SLC13A5		17p13.1	284111
*608341	CYTOCHROME b5 REDUCTASE 1; CYB5R1		1q32.1	51706
*608342	CYTOCHROME b5 REDUCTASE 2; CYB5R2		11p15.4	51700
*608343	CYTOCHROME b5 REDUCTASE 4; CYB5R4		6q14.2	51167
*608365	T-COMPLEX PROTEIN 10-LIKE; TCP10L		21q22.11	140290
*608521	LATE ENDOSOMAL/LYSOSOMAL ADAPTOR, MITOGEN-ACTIVATED PROTEIN KINASE AND MAMMALIAN TARGET OF RAPAMYCIN ACTIVATOR 5; LAMTOR5		1p13.3	10542
*608522	HEPATITIS B VIRUS X-ASSOCIATED PROTEIN; HBXAP		11q14.1	51773
*608536	GTP-BINDING PROTEIN 3; GTPBP3		19p13.11	84705
*608648	SEC63 HOMOLOG, PROTEIN TRANSLOCATION REGULATOR; SEC63		6q21	11231
*608669	BASONUCLIN 2; BNC2		9p22.3-p22.2	54796
*608700	NICOTINAMIDE NUCLEOTIDE ADENYLYLTRANSFERASE 1; NMNAT1		1p36.22	64802
*608736	SOLUTE CARRIER FAMILY 39 (ZINC TRANSPORTER), MEMBER 14; SLC39A14		8p21.3	23516
*608783	SET AND MYND DOMAIN-CONTAINING PROTEIN 3; SMYD3		1q44	64754
*608938	RIBOSOMAL PROTEIN S6 KINASE, 70-KD, 1; RPS6KB1		17q23.1	6198
*608960	ADP-RIBOSYLATION FACTOR-LIKE 5A; ARL5A		2q23.3	26225
*609051	CASPASE RECRUITMENT DOMAIN-CONTAINING PROTEIN 8; CARD8		19q13.33	22900
*609300	CYTOCHROME P450, FAMILY 17, SUBFAMILY A, POLYPEPTIDE 1; CYP17A1		10q24.32	1586
*609479	LEUCINE ZIPPER- AND STERILE ALPHA MOTIF-CONTAINING KINASE; ZAK		2q31.1	51776
*609582	MICRO RNA 122A; MIR122A		18q21.31	406906
*609600	ZINC FINGER PROTEIN 396; ZNF396		18q12.2	252884
*609601	ZINC FINGER PROTEIN 397; ZNF397		18q12.2	84307
*609684	MAL PROTEOLIPID PROTEIN 2; MAL2			114569
*609855	COENZYME A SYNTHASE; COASY		17q21.2	80347
*609866	START DOMAIN-CONTAINING PROTEIN 13; STARD13		13q13.1-q13.2	90627
*609911	HEPATOCELLULAR CARCINOMA-DOWNREGULATED MITOCHONDRIAL CARRIER PROTEIN		14q32.2	283600
*609986	CASPASE RECRUITMENT DOMAIN-CONTAINING PROTEIN 6; CARD6	CARD-CONTAINING INHIBITOR OF NOD1- AND CARDIAK-INDUCED NFKB ACTIVATION 1, INCLUDED; CINCIN1, INCLUDED	5p13.1	84674
*610035	VACUOLAR PROTEIN SORTING 45 HOMOLOG; VPS45		1q21.2	11311
*610057	TRANS-2,3-ENOYL-CoA REDUCTASE; TECR		19p13.12	9524
*610132	VANGL PLANAR CELL POLARITY PROTEIN 1; VANGL1		1p13.1	81839
*610146	INSULIN-LIKE GROWTH FACTOR II, ANTISENSE; IGF2AS		11p15.5	51214
*610166	IQ MOTIF- AND SEC7 DOMAIN-CONTAINING PROTEIN 1; IQSEC1		3p25.2-p25.1	9922
*610221	AKT1 SUBSTRATE 1, PROLINE-RICH; AKT1S1		19q13.33	84335
*610386	BTB/POZ DOMAIN-CONTAINING PROTEIN 7; BTBD7		14q32.12	55727
*610468	INTERFERON-INDUCED PROTEIN 44; IFI44		1p31.1	10561
*610528	CHROMODOMAIN HELICASE DNA-BINDING PROTEIN 8; CHD8		14q11.2	57680
*610562	ZINC FINGER CCCH DOMAIN-CONTAINING PROTEIN 12A; ZC3H12A		1p34.3	80149
*610782	MICRO RNA 29A; MIR29A		7q32.3	407021
*610783	MICRO RNA 29B1; MIR29B1		7q32.3	407024
*610784	MICRO RNA 29C; MIR29C		1q32.2	407026
*610936	PHOSPHOSERINE AMINOTRANSFERASE 1; PSAT1		9q21.2	29968
*611163	TOX HIGH MOBILITY GROUP BOX FAMILY MEMBER 2; TOX2		20q13.12	84969
*611322	DNAJ/HSP40 HOMOLOG, SUBFAMILY A, MEMBER 2; DNAJA2		16q11.2	10294
*611325	TRANSFORMING GROWTH FACTOR-BETA REGULATOR 4; TBRG4		7p13	9238
*611326	CELL CYCLE PROGRESSION 1; CCPG1		15q21.3	9236
*611443	DOUBLE HOMEOBOX PROTEIN 3; DUX3			26582
*611444	DOUBLE HOMEOBOX PROTEIN 5; DUX5			26581
*611627	FAMILY WITH SEQUENCE SIMILARITY 57, MEMBER A; FAM57A		17p13.3	79850
*611670	INOSITOL-3-PHOSPHATE SYNTHASE 1; ISYNA1		19p13.11	51477
*611806	ARSENIC (+3 OXIDATION STATE) METHYLTRANSFERASE; AS3MT		10q24.32	57412
*612045	C1q- AND TUMOR NECROSIS FACTOR-RELATED PROTEIN 3; C1QTNF3		5p13.2	114899
*612188	VPS39 SUBUNIT OF HOPS COMPLEX; VPS39		15q15.1	23339
*612349	PHENYLALANINE HYDROXYLASE; PAH		12q23.2	5053
*612503	ATP-BINDING CASSETTE, SUBFAMILY A, MEMBER 5; ABCA5		17q24.3	23461
*612625	LMBR1 DOMAIN-CONTAINING PROTEIN 1: LMBRD1		6q13	55788
*613019	SUCCINATE DEHYDROGENASE COMPLEX ASSEMBLY FACTOR 2; SDHAF2		11q12.2	54949
*613296	LYSOSOME-ASSOCIATED PROTEIN, TRANSMEMBRANE 4, BETA; LAPTM4B		8q22.1	55353
*613482	CYCLIN L2; CCNL2		1p36.33	81669
*613609	HOMEOSTATIC IRON REGULATOR; HFE		6p22.2	3077
*614057	MICRO RNA 409; MIR409	MICRO RNA 409-3p, INCLUDED; MIR409-3p, INCLUDED	14q32.31	574413
*614108	BPI FOLD-CONTAINING PROTEIN, FAMILY B, MEMBER 2; BPIFB2		20q11.21	80341
*614667	MITOCHONDRIAL tRNA TRANSLATION OPTIMIZATION 1; MTO1		6q13	25821
*614812	NUCLEAR PROTEIN, TRANSCRIPTIONAL REGULATOR, 1; NUPR1		16p11.2	26471
*615176	NPTN INTRONIC TRANSCRIPT 1, NONCODING; NPTNIT1		15q24.1	101241892
*615526	COATOMER PROTEIN COMPLEX, SUBUNIT ZETA-2; COPZ2		17q21.32	51226
*615661	PROGRAMMED CELL DEATH 2-LIKE PROTEIN; PDCD2L		19q13.11	84306
*616177	DDRGK DOMAIN-CONTAINING PROTEIN 1; DDRGK1		20p13	65992
*616215	cAMP RESPONSE ELEMENT-BINDING PROTEIN 3-LIKE 1; CREB3L1		11p11.2	90993
*616412	THIOREDOXIN DOMAIN-CONTAINING PROTEIN 5; TXNDC5		6p24.3	81567
*616594	ARF GTPase-ACTIVATING PROTEIN WITH SH3 DOMAIN, ANKYRIN REPEAT, AND PH DOMAIN 3; ASAP3		1p36.12	55616
*616663	SMALL NUCLEOLAR RNA, C/D BOX, 118; SNORD118		17p13.1	727676
*616686	SYNAPTOTAGMIN-BINDING CYTOPLASMIC RNA-INTERACTING PROTEIN; SYNCRIP		6q14.3	10492
*617208	MAM DOMAIN-CONTAINING PROTEIN 4; MAMDC4		9q34.3	158056
*617382	START DOMAIN-CONTAINING PROTEIN 10; STARD10		11q13.4	10809
*617471	SERPIN PEPTIDASE INHIBITOR, CLADE A, MEMBER 12; SERPINA12		14q32.13	145264
*617531	COLLAGEN BETA(1-O)GALACTOSYLTRANSFERASE 1; COLGALT1		19p13.11	79709
*617725	FUCOSE MUTAROTASE; FUOM		10q26.3	282969
*617758	ZINC FINGER PROTEIN 692; ZNF692		1q44	55657
*617889	PYRIDINE NUCLEOTIDE-DISULPHIDE OXIDOREDUCTASE DOMAIN-CONTAINING PROTEIN 2; PYROXD2		10q24.2	84795
*618033	ZINC FINGER PROTEIN 689; ZNF689		16p11.2	115509
*618338	METHYLTRANSFERASE-LIKE 7A; METTL7A		12q13.12	25840
*618712	ANKYRIN REPEAT DOMAIN-CONTAINING PROTEIN 45; ANKRD45		1q25.1	339416

## Sheet: Sheet1
Caption
Table name: Known Therapeutic Targets of HCC
The data was collected from the database Drug Bank and OMIM. Each known therapeutic targets of NPC treatments were provided with its gene ID and full name of the protein.
